# Supplementary material for: Optimizing Rainfed Cropping Patterns for Economic and Environmental Sustainability in East Lorestan Iran Using GIS and LCA
Source: Research Square preprint supplement (doi:10.21203/rs.3.rs-5670373/v1), 2025-04-24
Supplement: Supplementary file 1 [file 31a039cf3506a2a0736c2fe4.docx]

**Appendix S1: Questionnaire for Agricultural Life Cycle Assessment Study**

**Eastern Lorestan Province, Iran**

**Section A: General Information**

1. Respondent ID: _____

2. Location: □ Azna □ Aligudarz □ Doroud

3. Date: ___/___/___

**Section B: Farm Characteristics**

4. Total farm area (hectares): _____

5. Land ownership status:

□ Owner □ Tenant □ Share-cropping □ Other (specify)_____

6. Crop distribution (current year):

a) Wheat: _____ hectares

b) Barley: _____ hectares

c) Chickpea: _____ hectares

d) Lentil: _____ hectares

7. Years of farming experience: _____

**Section C: Agricultural Inputs**

8. Fertilizer usage (per hectare per year):

a) Nitrogen (Urea): _____ kg

b) Phosphate (DAP): _____ kg

c) Potassium: _____ kg

d) Other fertilizers (specify): _____ kg

9. Pesticide application (per hectare per year):

a) Herbicides: _____ L

b) Insecticides: _____ L

c) Fungicides: _____ L

10. Energy inputs (per hectare per year):

a) Diesel fuel consumption: _____ L

b) Electricity usage: _____ kWh

c) Number of tractor operations: _____

d) Hours of machinery use: _____

**Section D: Production Details (Per Crop)**

**Wheat**

11. Average yield: _____ tonnes/ha

12. Seeding rate: _____ kg/ha

13. Planting date: _____

14. Harvesting date: _____

**Barley**

15. Average yield: _____ tonnes/ha

16. Seeding rate: _____ kg/ha

17. Planting date: _____

18. Harvesting date: _____

**Chickpea**

19. Average yield: _____ tonnes/ha

20. Seeding rate: _____ kg/ha

21. Planting date: _____

22. Harvesting date: _____

**Lentil**

23. Average yield: _____ tonnes/ha

24. Seeding rate: _____ kg/ha

25. Planting date: _____

26. Harvesting date: _____

**Section E: Economic Information**

27. Production costs (per hectare):

a) Seeds: _____ $/ha

b) Fertilizers: _____ $/ha

c) Pesticides: _____ $/ha

d) Machinery: _____ $/ha

e) Labor: _____ $/ha

f) Other costs: _____ $/ha

28. Market prices received (current year):

a) Wheat: _____ $/tonne

b) Barley: _____ $/tonne

c) Chickpea: _____ $/tonne

d) Lentil: _____ $/tonne

**Section F: Environmental Management**

29. Soil management practices (select all that apply):

□ Crop rotation

□ Minimum tillage

□ No-tillage

□ Cover cropping

□ Residue management

□ Other (specify)_____

30. Water management:

a) Source of water for rainfed farming:

□ Only rainfall

□ Supplemental irrigation

□ Other (specify)_____

b) If supplemental irrigation is used:

Water source: _____

Amount used (m³/ha): _____

31. Erosion control measures (select all that apply):

□ Terracing

□ Contour farming

□ Strip cropping

□ Wind breaks

□ Other (specify)_____

**Section G: Technical Support**

32. Do you receive agricultural extension services?

□ Yes □ No

33. If yes, frequency of extension visits per year: _____

34. Sources of technical information (select all that apply):

□ Extension agents

□ Other farmers

□ Agricultural cooperatives

□ Research centers

□ Internet

□ Other (specify)_____

**Section H: Challenges and Constraints**

35. Major challenges in rainfed farming (rank 1-5, 1 being most important):

___ Water availability

___ Soil fertility

___ Market access

___ Input costs

___ Climate variability

___ Other (specify)_____

**Declaration**

I confirm that the information provided in this questionnaire is accurate to the best of my knowledge.

Farmer's signature: _____

Interviewer's signature: _____

Date: ___/___/___

Note: All information provided will be kept confidential and used only for research purposes.

**Appendix S2:** **Statistical Analysis of Responses**

**1. Survey Methodology**

1.1 Sample Size Determination

- Population: Farmers in Azna, Aligudarz, and Doroud regions

- Confidence level: 95%

- Margin of error: 5%

- Sample size calculation using Cochran's formula:

n = (Z²pq)/e²

where:

- Z = 1.96 (95% confidence level)

- p = 0.5 (maximum variability)

- q = 0.5

- e = 0.05 (margin of error)

1.2 Sampling Strategy

- Stratified random sampling across three cities

- Proportional allocation based on farming population in each region

**2. Statistical Analysis**

2.1 Response Rate

- Total questionnaires distributed: 384

- Valid responses received: 356

- Response rate: 92.7%

2.2 Descriptive Statistics

Farm Size Distribution

- Mean: 8.4 ha

- Median: 7.2 ha

- Standard deviation: 3.6 ha

Crop Distribution

- Wheat: 68%

- Barley: 25%

- Chickpea: 4%

- Lentil: 3%

Input Usage (Mean ± SD)

- N fertilizer: 120 ± 15 kg/ha

- P fertilizer: 85 ± 10 kg/ha

- Pesticides: 3.2 ± 0.8 L/ha

2.3 Reliability Analysis

- Cronbach's alpha: 0.87

- Inter-item correlation: 0.72

2.4 Statistical Tests

ANOVA Results

- Significant differences in input use across regions (p < 0.05)

- Post-hoc analysis using Tukey's HSD

2.5 Correlation Analysis

- Significant correlation between farm size and input use (r = 0.68, p < 0.01)

- Environmental awareness positively correlated with sustainable practice adoption (r = 0.72, p < 0.01)

**3. Data Quality Assurance**

- Pilot testing conducted with 30 farmers

- Data validation through cross-checking with agricultural extension records

- Missing data handled through multiple imputation

**Appendix S3: Analytical Hierarchy Process (AHP) Questionnaire**

**For Determining Weights in Multi-Objective Agricultural Planning**

**Expert Information**

- Name: _____________________

- Institution: ________________

- Years of Experience: ________

- Field of Expertise: _________

- Date: _____________________

**Instructions**

1. Please compare the relative importance of each pair of objectives using the scale below

2. For each comparison, circle or mark the number that best represents your judgment

3. The scale represents how many times more important the first objective is compared to the second

**Scale Definition**

- 1: Equal importance

- 3: Moderate importance

- 5: Strong importance

- 7: Very strong importance

- 9: Extreme importance

- 2,4,6,8: Intermediate values

**Section 1: Main Objectives Comparison**

Compare the relative importance of economic objectives versus environmental objectives:

Economic vs Environmental Objectives

Environmental | 9 8 7 6 5 4 3 2 1 2 3 4 5 6 7 8 9 | Economic

**Section 2: Environmental Sub-objectives Comparison**

Please compare the relative importance of the following environmental impacts:

2.1 Global Warming Potential vs Human Health Impact

GWP | 9 8 7 6 5 4 3 2 1 2 3 4 5 6 7 8 9 | Human Health

2.2 Global Warming Potential vs Ecosystem Quality

GWP | 9 8 7 6 5 4 3 2 1 2 3 4 5 6 7 8 9 | Ecosystem

2.3 Human Health Impact vs Ecosystem Quality

Human Health | 9 8 7 6 5 4 3 2 1 2 3 4 5 6 7 8 9 | Ecosystem

**Section 3: Economic Sub-objectives Comparison**

Please compare the relative importance of the following economic factors:

3.1 Net Profit vs Production Costs

Net Profit | 9 8 7 6 5 4 3 2 1 2 3 4 5 6 7 8 9 | Production Costs

3.2 Net Profit vs Market Risk

Net Profit | 9 8 7 6 5 4 3 2 1 2 3 4 5 6 7 8 9 | Market Risk

3.3 Production Costs vs Market Risk

Production Costs | 9 8 7 6 5 4 3 2 1 2 3 4 5 6 7 8 9 | Market Risk

**Expert Comments**

Please provide any additional comments or considerations that influenced your judgments:

___________________________________________________________________________

___________________________________________________________________________

___________________________________________________________________________

Consistency Check (To be filled by researchers)

- Consistency Ratio for Environmental Comparisons: _______

- Consistency Ratio for Economic Comparisons: _______

- Overall Consistency Ratio: _______

Note: A consistency ratio less than 0.1 is considered acceptable.

**Declaration**

I confirm that the above comparisons represent my professional judgment based on my expertise and experience in the field.

Signature: _________________

Date: _____________________

**Appendix S4: Diesel Consumption Details in Agricultural Operations**

Agricultural operations in the study region utilized standard machinery including Massey Ferguson 285 (75 HP) tractors for tillage and planting operations, and New Holland combines for harvesting. Below is the detailed breakdown of diesel consumption per hectare:

Table S4.1: Diesel Consumption by Agricultural Operation

Operation | Fuel Consumption (L/ha)

----------|----------------------

Primary tillage | 18.5

Secondary tillage | 12.3

Seeding | 8.7

Fertilizer application | 4.2

Pesticide spraying | 3.8

Harvesting | 15.6

Total consumption | 63.1

Notes:

1. Fuel consumption values represent averages across the study region

2. Values account for local conditions:

- Average altitude: 1,800 m above sea level

- Mean annual temperature: 15°C

- Engine load factors: 65-75%

3. Emission factors per liter of diesel:

- CO2: 2.68 kg

- NOx: 0.04 kg

- SO2: 0.008 kg

- PM10: 0.003 kg

These values were adjusted for local conditions including average altitude (1,800 m above sea level), mean annual temperature (15°C), and typical engine load factors during field operations (65-75%). The total emissions were calculated by multiplying the fuel consumption for each operation by the corresponding emission factors, considering the specific operational conditions of the study area.
